# Supplementary material for: Armed Oncolytic Myxoma Virus Induces Systemic Antitumor Immunity Against Solid Tumors in Immunocompetent Mice
Source: Research Square preprint supplement (doi:10.21203/rs.3.rs-10093553/v1), 2026-07-09

**Supplementary Figure Legends**

**Supplemental Figure S1. Tumor burden after treatment of the left flank with WT-MYXV and armed MYXVs.** Tumor volumes on the left (A-E) and the right (F-J) flanks were measured every 2-3 days using a digital caliper after the start of treatments until tumors reached endpoint size (~1200 mm3).

**Supplemental Figure S2. Treatment with vMyx-IL15 and vMyx-mIL15Rα increases CD8+ T cell infiltration into the tumor bed.** BALB/c mice were inoculated with CT26 cells at day 0 via SQ injection on both flanks. Animals received two doses of intratumoral delivery of different MYXVs on the left hind flank. Mice were euthanized 3 days after the second virus inoculation, and tumor sections were analyzed for the presence of CD8+ T cells by immunostaining. Results are presented as mean ± SEM. Statistically significant differences are indicated. ns *P* > 0.05, * *P* < 0.05, ** *P* < 0.01, *** *P* < 0.001, **** *P* < 0.0001.

**Supplemental Figure S3. Comparison of the frequencies of tumor-infiltrating lymphocytes isolated from untreated and treated tumors.** Tumors were processed to obtain single-cell suspensions for flow cytometric staining and analysis. Cells were stained to phenotype: A-B) CD3+ T cell lymphocytes, C-D) CD4+ T cells, E-F) CD8+ T cells. The percentage number of cells per tumor is presented in a scatter dot plot with group average. PBS: white circle; WT-MYXV: orange; mIL15: pink; mIL15Ra-IL15: green; mLIGHT: blue. Statistically significant differences were calculated by Brown-Forsythe and Welsh ANOVA, followed by Dunnett’s T3 multiple comparison test. * *P* < 0.03, ** *P* < 0.004, **** *P* < 0.0001.

**Supplemental Figure S4. Comparison of the frequencies of tumor-infiltrating DC and NKT cells isolated from untreated and treated tumors.** Tumors were processed to obtain single-cell suspensions for flow cytometric staining and analysis. Cells were stained to phenotype: A-B) NKT and C-D) DC cells. The percentage number of cells per tumor is presented in a scatter dot plot with group average. PBS: white circle; WT-MYXV: orange; mIL15: pink; mIL15Ra-IL15: green; mLIGHT: blue. Statistically significant differences were calculated by Brown-Forsythe and Welsh ANOVA, followed by Dunnett’s T3 multiple comparison test. * *P* < 0.03, ** *P* < 0.004, **** *P* < 0.0001.

**Supplemental Figure S5. A Venn diagram presenting the differential cytokine and chemokine expression in the serum after treatment with different armed MYXVs.** Proteins in red and blue font were upregulated over 2-fold and under 0.8-fold, respectively. Proteins outside the Venn diagram did not have a significant change over the PBS control.


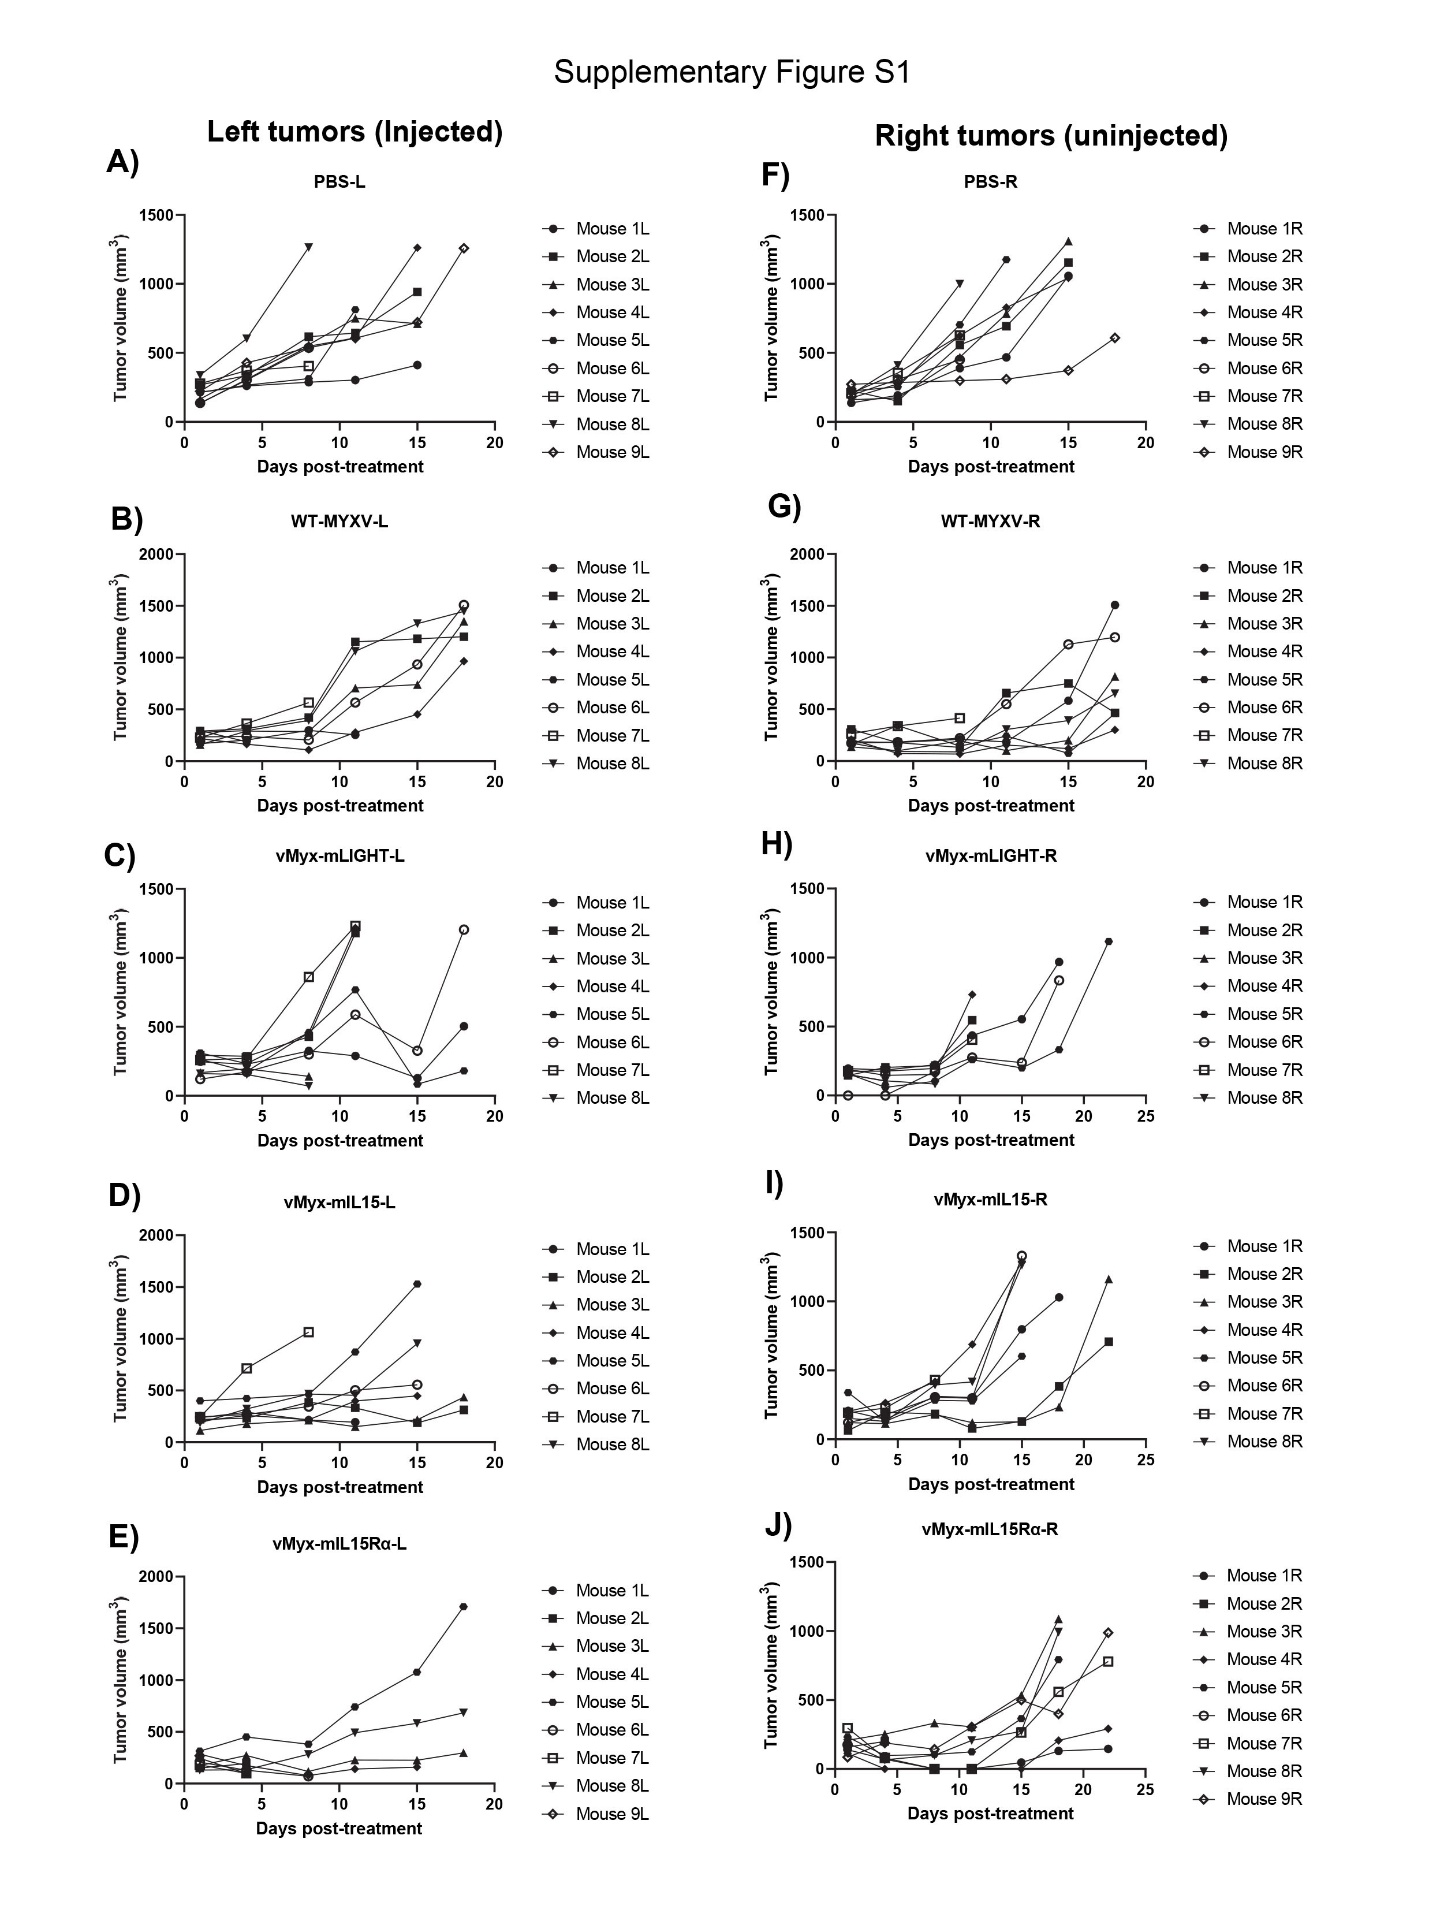


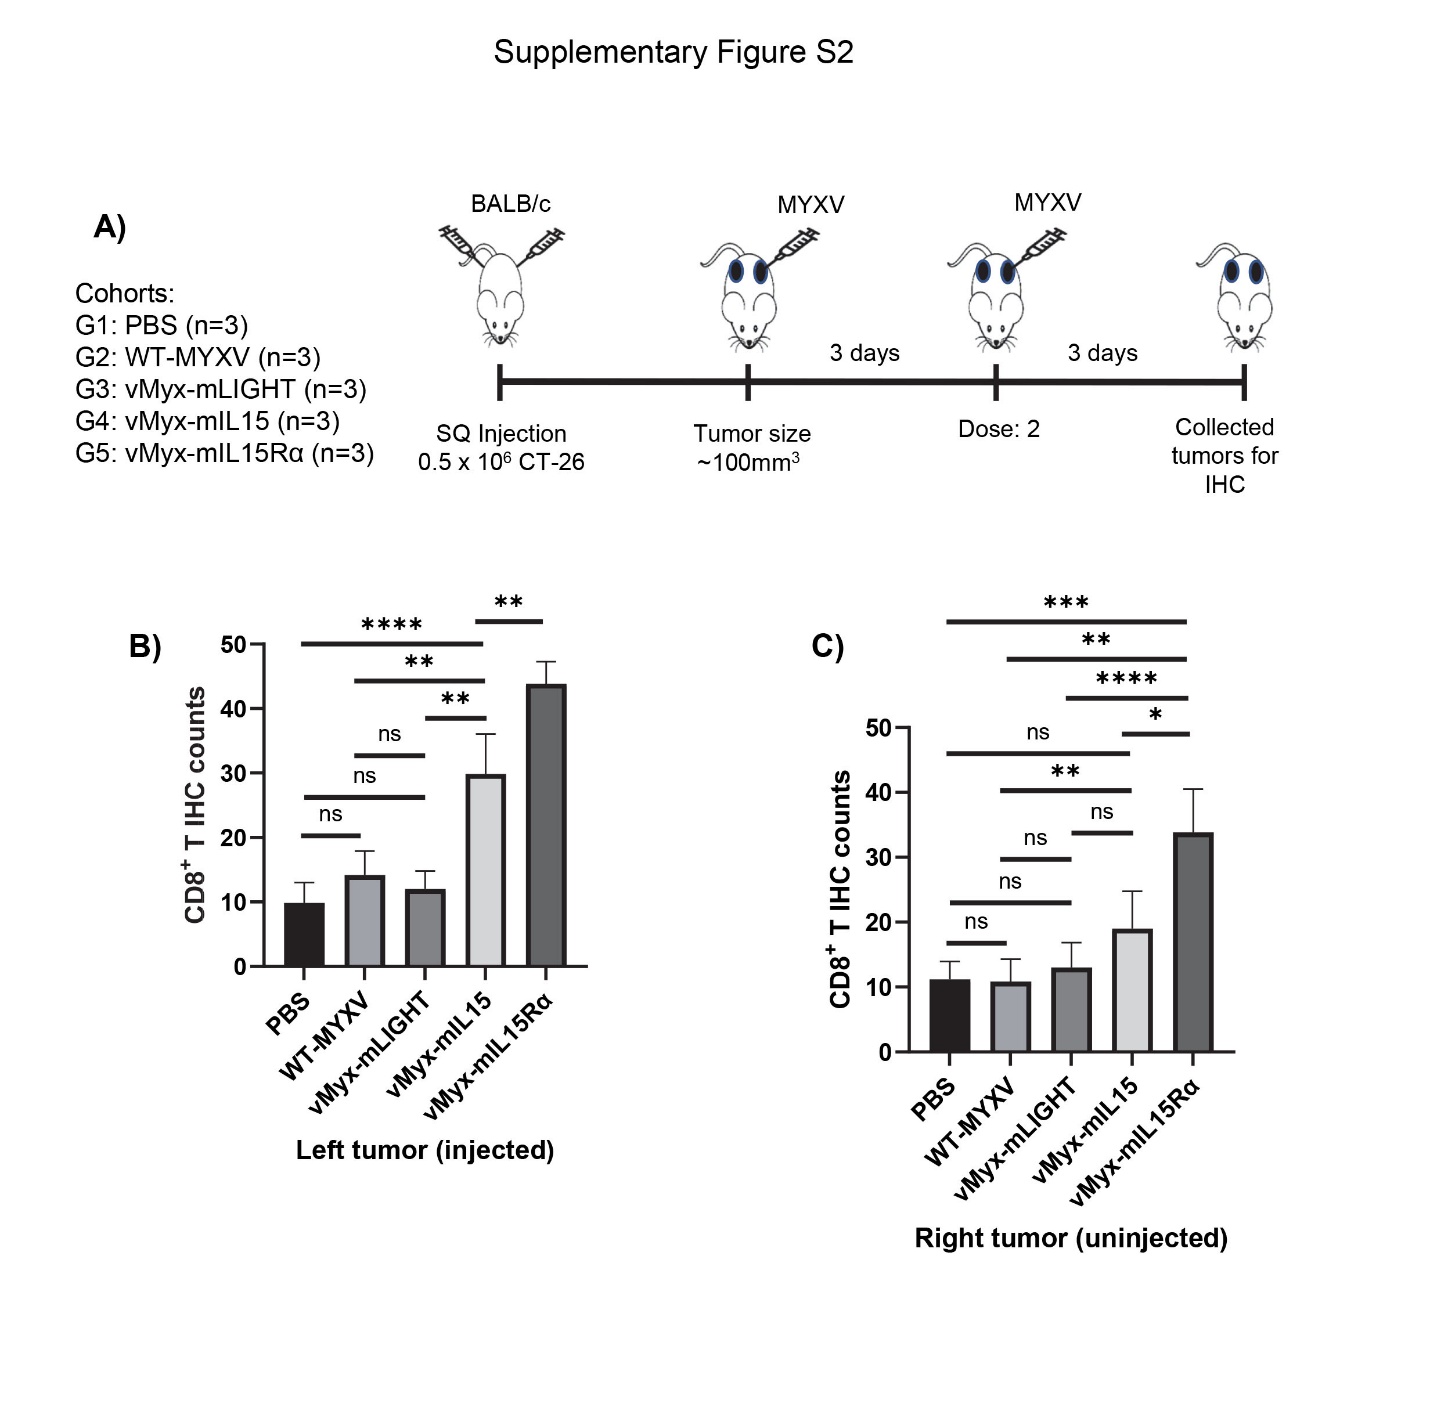


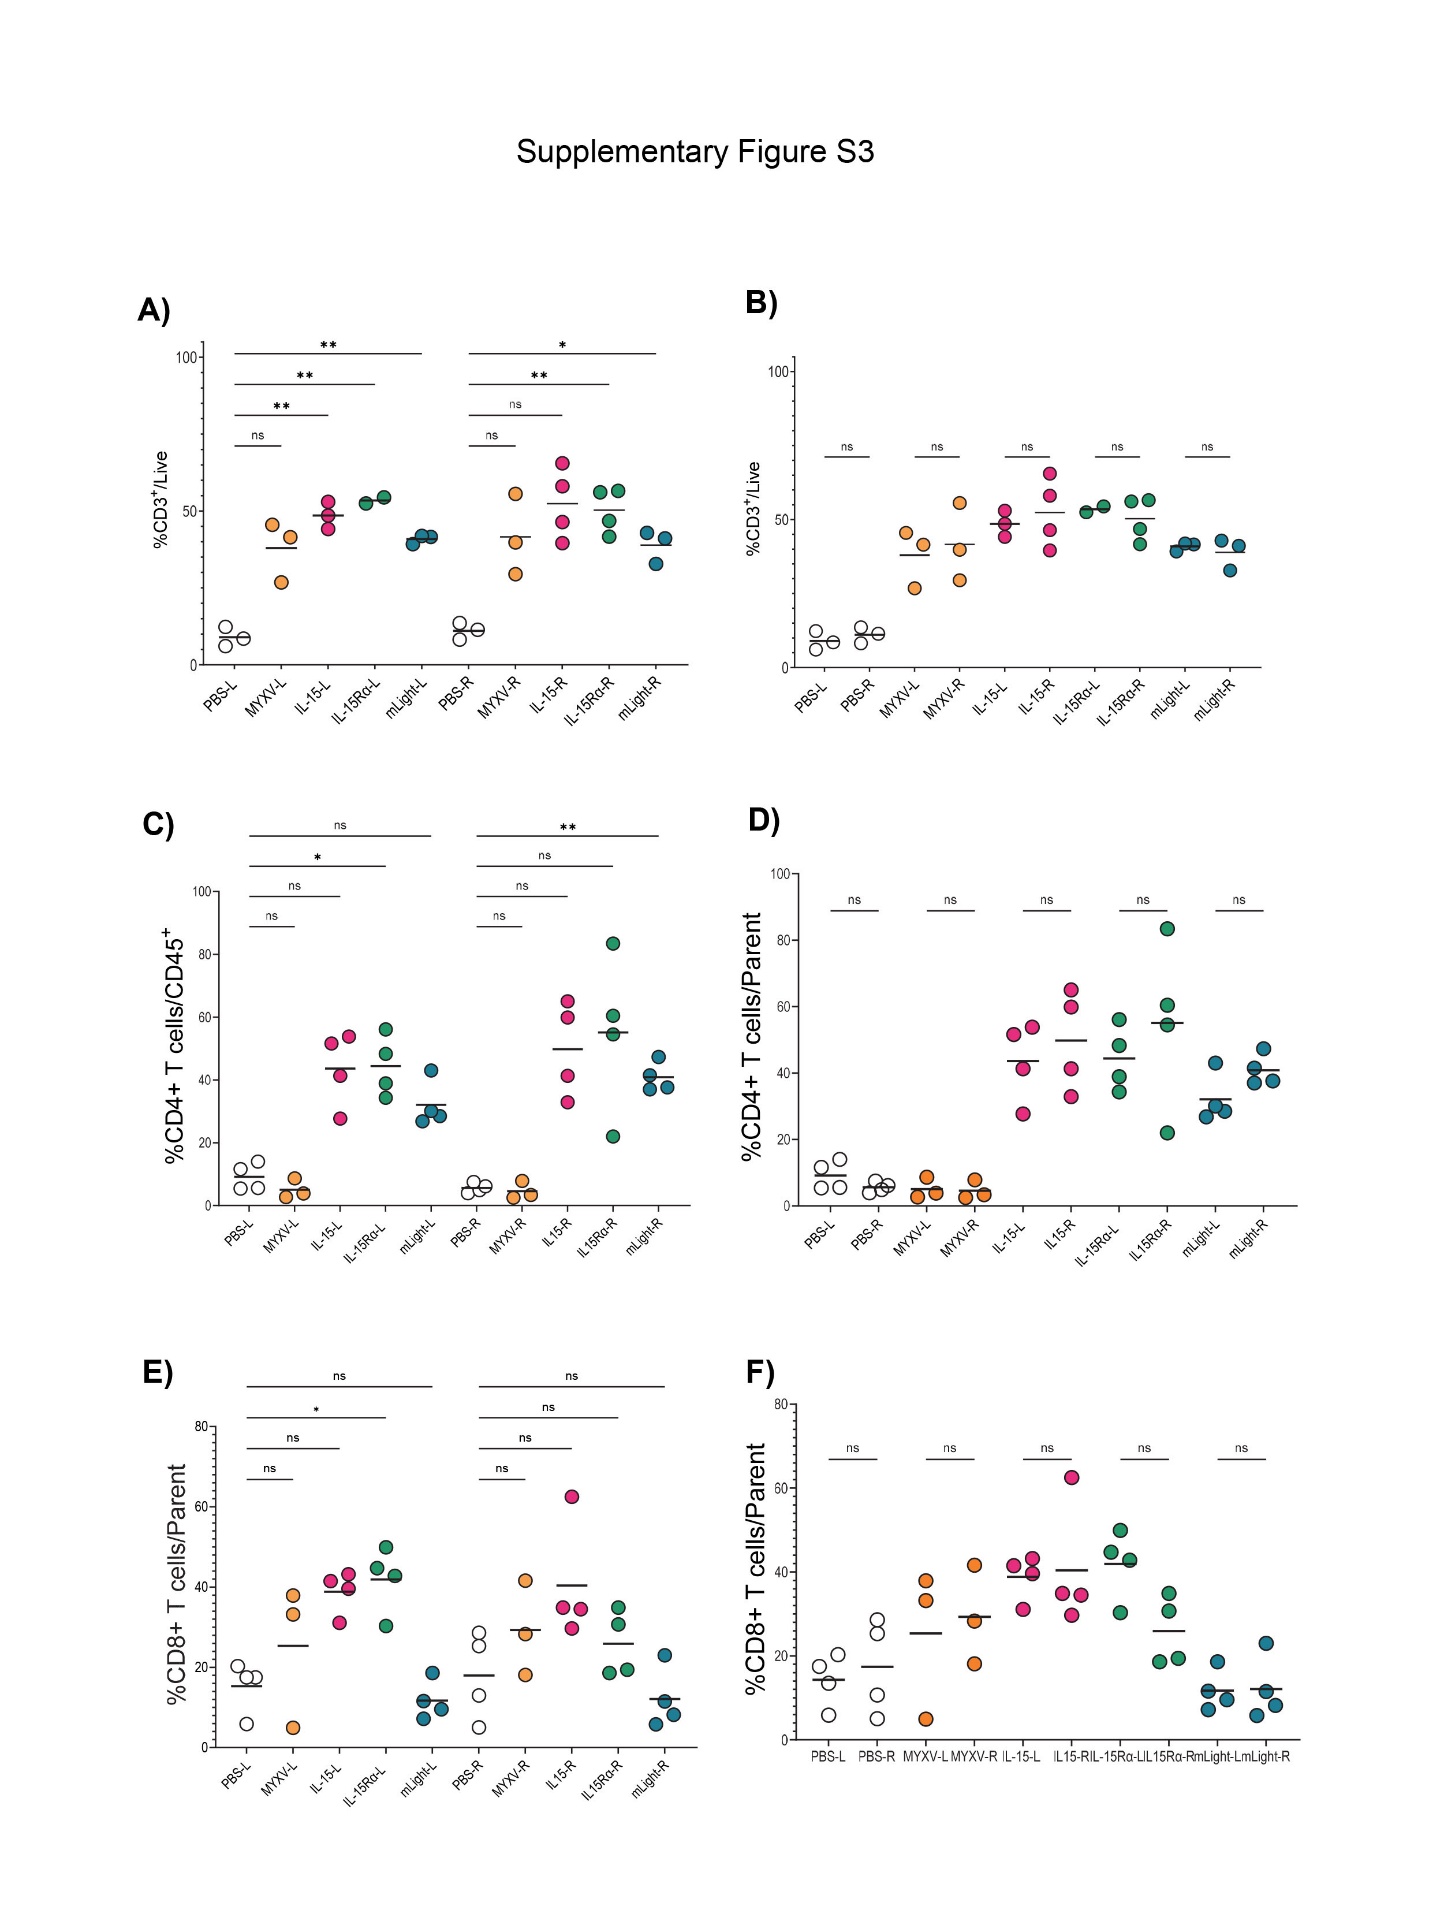


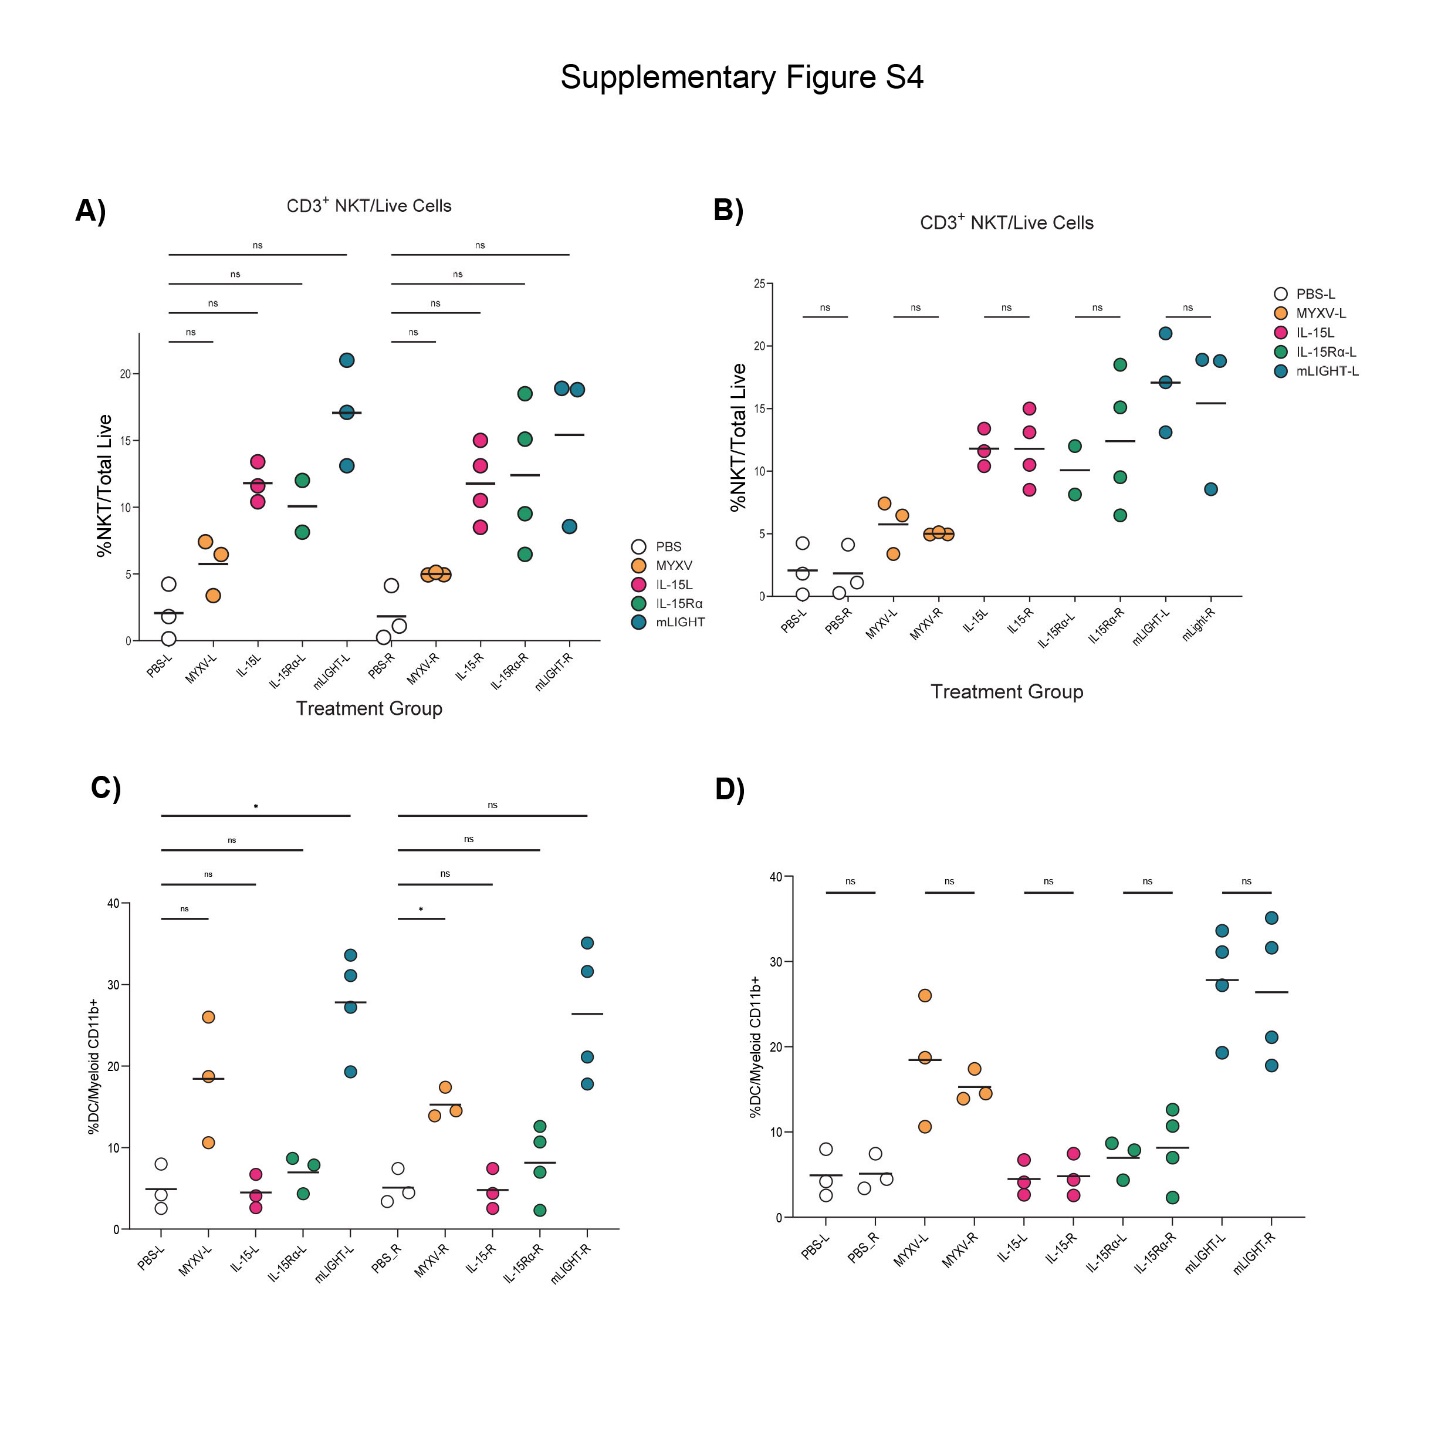


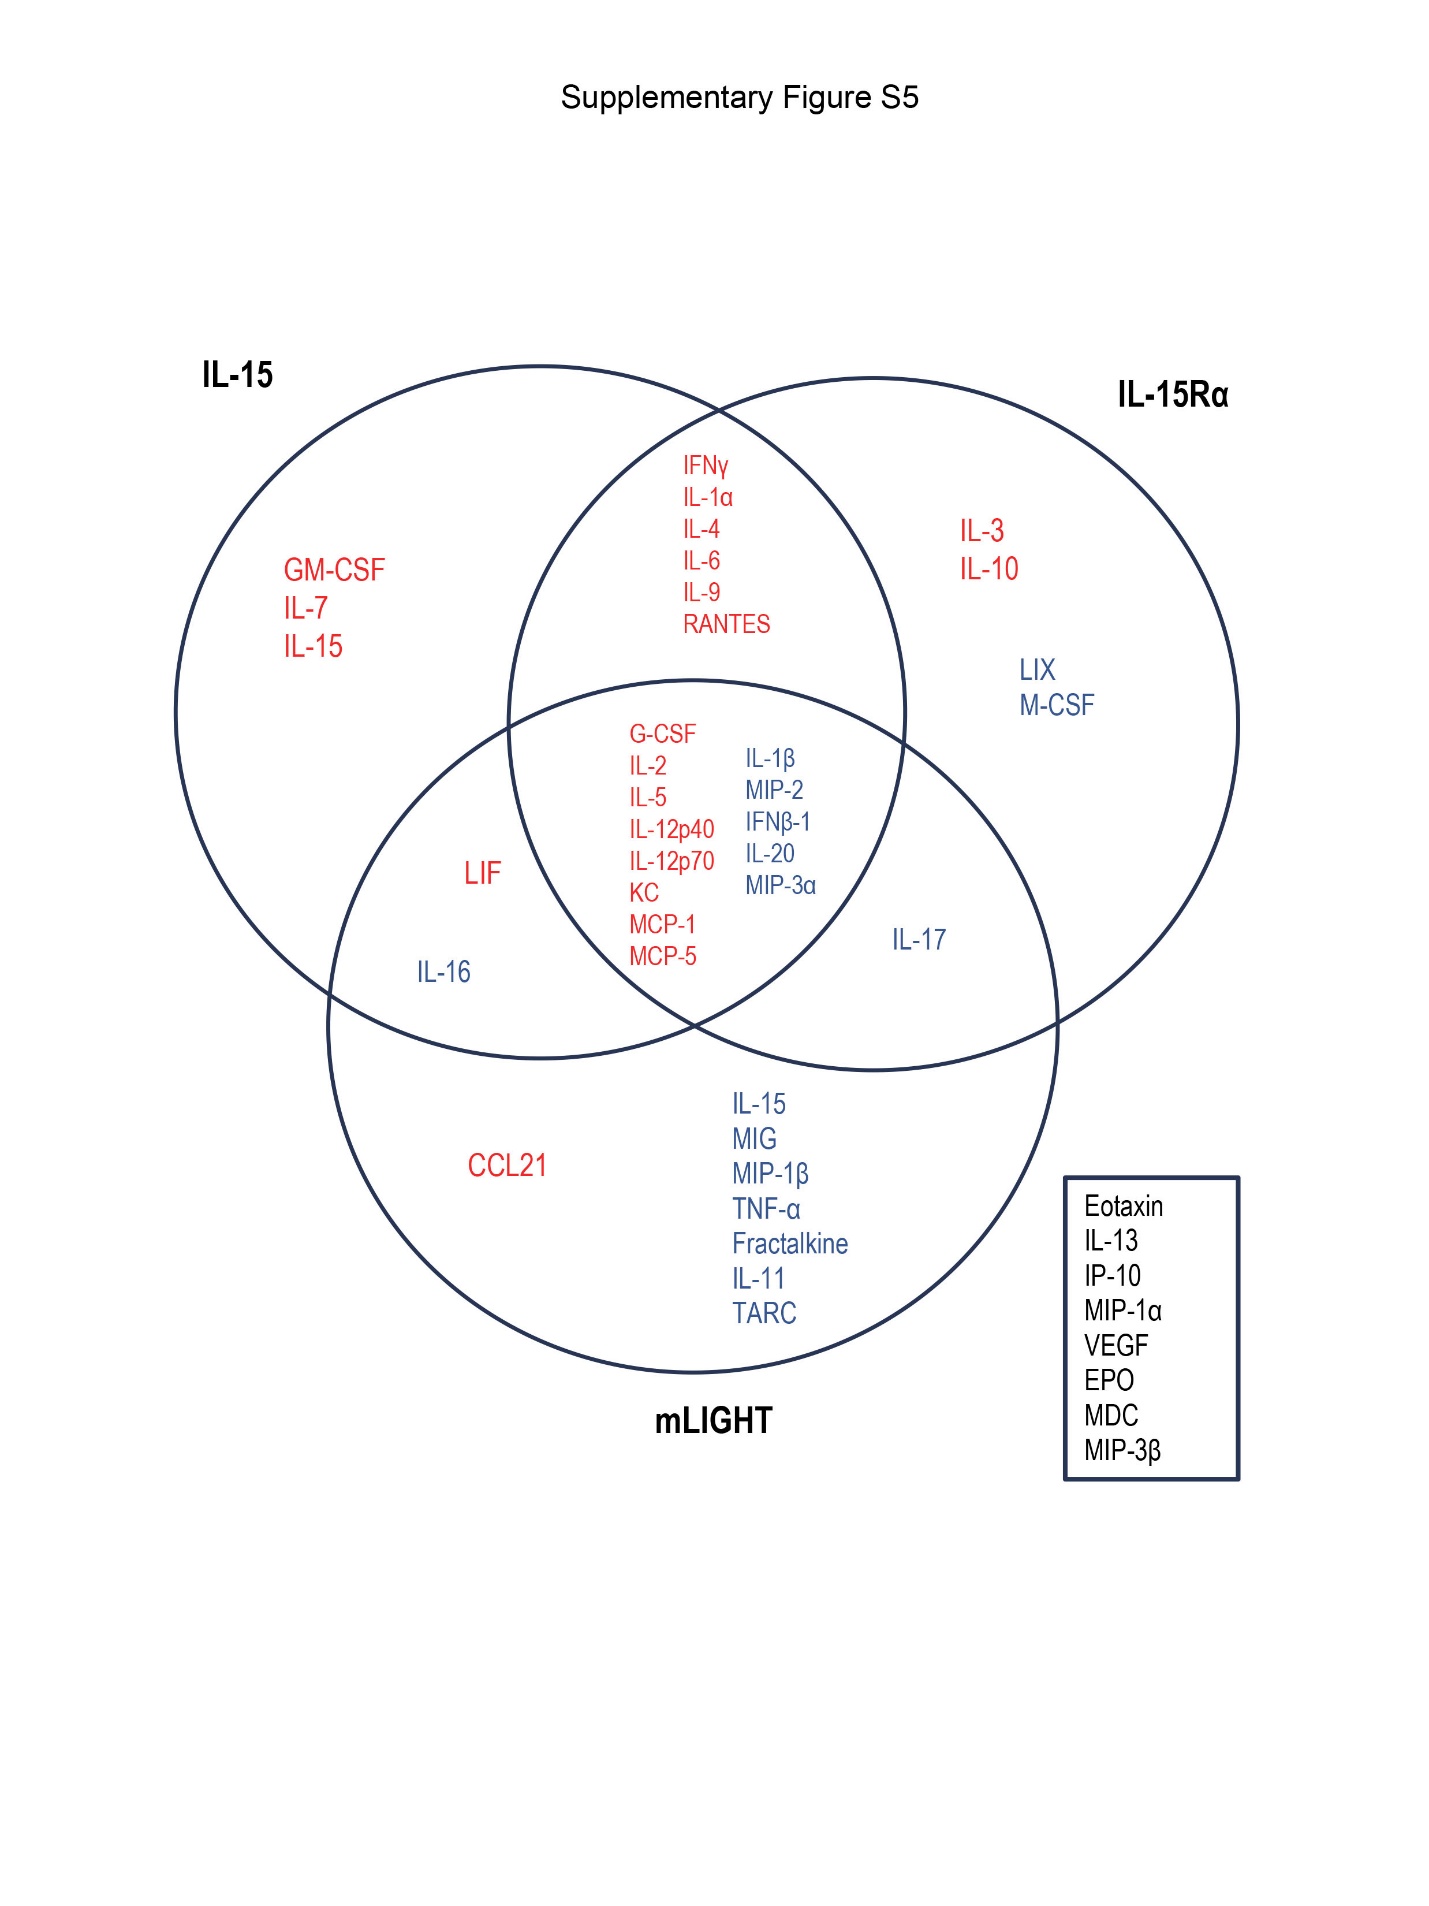

Supplement: Supplementary file 1 [file f4c58c42ac5f3c6348c1a570.docx]
