# Supplementary material for: Armed Oncolytic Myxoma Virus Induces Systemic Antitumor Immunity Against Solid Tumors in Immunocompetent Mice
Source: Research Square preprint supplement (doi:10.21203/rs.3.rs-10093553/v1), 2026-07-09
Supplement: Supplementary file 1 [file 68a0508518c8be3613df6063.xlsx]

## Sheet: T Cells
Supplementary table 1. T cell frequencies from parent population or total live cells. Tem: effector memory; Tcm: central memory; Tn: naïve
PBS
Mouse	Flank	CD4+	CD4+Tem	CD4+Tcm	CD4+Tn	CD4+Teff	CD8+	CD8+Tem	CD8+Tcm	CD8+Tn	CD8+Teff	CD4+/Live	CD4+Tem/Live	CD8+/Live	CD8+Tem/Live				FOLD CHANGE
1	L	14	96.8	2.11	0	1.05	17.5	94.1	0	0	5.88	10.8	10.5	13.6	12.8					CD4+	CD4+Tem	CD4+Tcm	CD4+Tn	CD4+Teff	CD8+	CD8+Tem	CD8+Tcm	CD8+Tn	CD8+Teff	CD4+/Live	CD4+Tem/Live	CD8+/Live	CD8+Tem/Live
1	R	3.94	97.1	2.94	0	0	5.03	98.5	0.77	0	0.77	2.59	2.52	3.3	3.25				IL-15	6.32515	0.927836	0.0864979	3.02335	22.106	2.38131	0.773258	0.136804	7.72201	15.941	0.445397	0.406967	0.181778	0.14038
2	L	5.4	98.5	0.31	0	1.23	17.5	98	0.28	0	1.7	4.45	4.38	14.4	14.1				IL-15Ra	6.73836	0.859146	0.178797	1.93385	37.1495	2.03801	0.789426	0.152542	3.0888	14.9758	1.00885	0.897763	0.392989	0.361217
2	R	7.49	98.2	1.82	0	0	13	99.9	0	0	0.095	5.54	5.44	9.66	9.65				mLight	4.94157	0.994983	0.685127	2.31907	3.74565	0.716947	0.801617	0.711864	10.9653	13.6613	6.47221	6.41745	1.11389	0.898555
3	L	11.6	98.4	1.56	0	0.082	5.89	97.6	1.78	0	0.65	7.8	7.68	3.96	3.87				WT-MYXV	0.653006	1.02804	0	0	0.13905	1.64303	1.01715	0	0	0.0656007	0.882868	0.902483	2.87748	2.9384
3	R	4.9	95.9	4.1	0	0	28.6	97.8	1.4	0.073	0.73	1.61	1.54	9.39	9.18
4	L	5.58	96.4	2.56	0.23	0.79	20.3	96	1.88	0.12	1.98	1.27	1.23	4.62	4.44
4	R	6.14	96.1	3.56	0.027	0.3	25.3	97.4	2.15	0.066	0.39	2.11	2.02	8.68	8.46
	Average	7.38125	97.175	2.37	0.032125	0.4315	16.64	97.4125	1.0325	0.032375	1.52438	4.52125	4.41375	8.45125	8.21875
	SD	3.5522	1.05796	1.1976	0.0805099	0.513627	8.42205	1.72663	0.880596	0.0473586	1.871	3.37651	3.30532	4.2372	4.07933
	Median	5.86	96.95	2.335	0	0.191	17.5	97.7	1.085	0	0.75	3.52	3.45	9.035	8.82
WT-MYXV
Mouse	Flank	CD4+	CD4+Tem	CD4+Tcm	CD4+Tn	CD4+Teff	CD8+	CD8+Tem	CD8+Tcm	CD8+Tn	CD8+Teff	CD4+/Live	CD4+Tem/Live	CD8+/Live	CD8+Tem/Live
1	L	2.69	100	0	0	0	37.9	100	0	0	0	2.53	2.53	35.6	35.6
1	R	2.5	100	0	0	0	28.3	99.9	0	0	0.13	2.18	2.18	24.7	24.7
2	L	3.87	100	0	0	0	33.2	99.8	0	0	0.2	3.29	3.29	28.2	28.1
2	R	7.83	99.6	0	0	0.36	41.6	99.7	0	0	0.27	7.21	7.18	38.3	38.2
3	L	8.65	99.8	0	0	0	4.94	99.8	0	0	0	5.8	5.78	3.31	3.3
3	R	3.38	100	0	0	0	18.1	95.3	0	0	0	2.94	2.94	15.8	15
	X	4.82	99.9	0	0	0.06	27.34	99.0833	0	0	0.1	3.99167	3.98333	24.3183	24.15
	SD	2.70645	0.167332	0	0	0.146969	13.6913	1.85625	0	0	0.118152	2.03198	2.01892	13.0529	13.1366
	Median	3.625	100	0	0	0	30.75	99.8	0	0	0.065	3.115	3.115	26.45	26.4
IL-15
Mouse	Flank	CD4+	CD4+ Tem	CD4+ Tcm	CD4+ Tn	CD4+ Teff	CD8+	CD8+ Tem	CD8+ Tcm	CD8+ Tn	CD8+ Teff	CD4+/Live	CD4+Tem/Live	CD8+/Live	CD8+Tem/Live
1	R	41.3	89.1	0	0	10.9	62.5	72.6	0.22	0.22	27	1.37	1.22	2.08	1.51
1	L	41.3	90.2	0	0	9.81	41.5	63.3	0	0.47	36.3	1.42	1.28	1.43	0.9
2	R	32.9	92.9	0	0	7.06	34.9	80.4	0.74	0.37	18.5	1.25	1.16	1.32	1.07
2	L	27.7	94	0	0	6.02	39.6	79	0	0.26	20.7	0.59	0.55	0.84	0.66
3	R	65	87.4	1.32	0.47	10.8	29.7	75.6	0.17	0.51	23.8	3.78	3.3	1.73	1.31
3	L	53.8	91.9	0.32	0.21	7.6	31.1	78.6	0	0	21.4	3	2.76	1.73	1.36
4	R	59.9	84.9	0	0.097	15	34.5	75.6	0	0.17	24.2	2.94	2.5	1.69	1.28
4	L	51.6	90.9	0	0	9.12	43.2	77.5	0	0	22.5	1.76	1.6	1.47	1.14
	Average	46.6875	90.1625	0.205	0.097125	9.53875	39.625	75.325	0.14125	0.25	24.3	2.01375	1.79625	1.53625	1.15375
	SD	13.0565	2.98182	0.464235	0.168584	2.82343	10.4152	5.43658	0.257817	0.19376	5.47462	1.09492	0.947205	0.366759	0.27391
	Median	46.45	90.55	0	0	9.465	37.25	76.55	0	0.24	23.15	1.59	1.44	1.58	1.21
IL-15Ra
Mouse	Flank	CD4+	CD4+ Tem	CD4+ Tcm	CD4+ Tn	CD4+ Teff	CD8+	CD8+ Tem	CD8+ Tcm	CD8+ Tn	CD8+ Teff	CD4+/Live	CD4+Tem/Live	CD8+/Live	CD8+Tem/Live
1	R	83.4	69	0.23	0.18	30.6	18.6	69.3	0.11	0	30.6	7.22	4.98	1.61	1.11
1	L	38.9	83.9	0	0	16.1	44.7	66.4	0	0	33.6	1.76	1.47	2.02	1.34
2	R	60.4	73.5	0.2	0	26.3	30.7	68.3	0	0	31.7	2.16	1.59	1.1	0.75
2	L	48.3	83.7	0.23	0	16.1	42.8	77.6	0.26	0.13	22	1.95	1.63	1.72	1.34
3	R	54.5	85.1	0	0	14.9	34.9	79.9	0	0	20.1	1.51	1.29	0.97	0.77
3	L	34.3	88.9	0	0.26	10.8	49.9	75.5	0.18	0.54	23.7	1.31	1.17	1.91	1.44
4	R	22	96.5	2.73	0.057	0.74	19.4	95.9	0.71	0.13	3.23	18.1	17.4	15.9	15.9	too small, barely any cells
4	L	56.1	87.3	0	0	12.7	30.3	82.3	0	0	17.7	2.48	2.17	1.34	1.1
	Average	49.7375	83.4875	0.42375	0.062125	16.03	33.9125	76.9	0.1575	0.1	22.8287	4.56125	3.9625	3.32125	2.96875
	SD	18.6594	8.66527	0.93825	0.101681	9.1906	11.4667	9.58853	0.244292	0.187236	9.81557	5.79422	5.56824	5.09608	5.23129
	Median	51.4	84.5	0.1	0	15.5	32.8	76.55	0.055	0	22.85	2.055	1.61	1.665	1.225
mLIGHT
		CD4+	CD4+ Tem	CD4+ Tcm	CD4+ Tn	CD4+ Teff	CD8+	CD8+ Tem	CD8+ Tcm	CD8+ Tn	CD8+ Teff	CD4+/Live	CD4+Tem/Live	CD8+/Live	CD8+Tem/Live
1	R	41.5	90.4	5.42	0.35	3.79	5.8	87.8	2.79	1.78	7.59	21.8	19.7	3.05	2.68
1	L	26.8	95.6	2.09	0.066	2.28	9.56	70.3	0.8	0.42	28.5	26.2	25	9.35	6.57
2	R	37.6	97.1	1.33	0.04	1.54	8.2	73.8	0.79	0.11	25.3	37.1	36	8.09	5.97
2	L	28.5	96.9	1.54	0.059	1.52	7.18	74	0.68	0.17	25.2	28.2	27.3	7.12	5.27
3	R	37	96.8	0.69	0.032	2.44	11.5	55.5	0.18	0.16	44.1	36.7	35.5	11.4	6.33
3	L	30.1	97.3	1.47	0.035	1.23	11.6	64.9	0.35	0.2	34.6	29.8	29	11.5	7.46
4	R	47.3	99.7	0.25	0	0.037	23	99.1	0.17	0	0.77	23.4	23.3	11.4	11.4
4	L	43	99.7	0.2	0.014	0.093	18.6	99.3	0.12	0	0.54	30.9	30.8	13.4	13.4
	Average	36.475	96.6875	1.62375	0.0745	1.61625	11.93	78.0875	0.735	0.355	20.825	29.2625	28.325	9.41375	7.385
	SD	7.41037	2.91471	1.67041	0.113377	1.24343	5.94014	15.882	0.877252	0.590786	16.1174	5.60967	5.71608	3.28738	3.4371
	Median	37.3	97	1.4	0.0375	1.53	10.53	73.9	0.515	0.165	25.25	29	28.15	10.375	6.45

## Sheet: NK
Supplementary table 2. NK frequencies, percentage from parent population or from total live cells. NKT: Natural killer T cell; mAct NKT: CD69+ NKT; NK: Natural killer cell; Act NK: CD69+ NK Cell
PBS
Mouse	Flank	CD3+	NKT Cells	Act NKT	NK Cells	Act NK	CD3+/Live	NKT/Live	Act NKT/Live	NK/Live	Act NK/Live		FOLD CHANGE
1	L	19.4	34.4	0.15	26.3	1.02	12.3	4.24	0.00652	13.4	0.14			CD3+	NKT Cells	Act NKT	NK Cells	Act NK	CD3+/Live	NKT/Live	Act NKT/Live	NK/Live	Act NK/Live
1	R	29.5	3.18	0.62	31.2	0.4	8.22	0.26	0.00161	6.05	0.024		IL-15	1.56875	1.71327	265.383	0.499231	84.3898	5.06309	6.05431	1177.42	0.987438	66.158
2	L	29	2.55	0	30.5	0.11	6.07	0.15	0	4.51	0.00499		IL-15Ra	1.55493	1.62804	267.072	0.556801	93.9359	5.12277	5.96832	1169.5	1.09828	76.1364
2	R	32.5	9.68	0.3	25	1.67	11.4	1.1	0.00332	5.84	0.098		mLight	1.93196	2.37945	145.58	0.55453	93.6735	3.9837	8.34332	899.378	0.66408	43.7234
3	L	30.6	21.3	0.54	22.2	0.23	8.53	1.81	0.00975	4.24	0.00975		WT-MYXV	1.65169	0.820037	1.05525	0.344613	11.6764	3.97039	2.76027	17.3936	0.571839	4.9505
3	R	19.2	30.3	0.2	1.33	0	13.6	4.12	0.027	0.76	0
	Average	26.7	16.9017	0.301667	22.755	0.571667	10.02	1.94667	0.00803333	5.8	0.0461233
	SD	5.85696	13.7946	0.23769	11.0295	0.647068	2.86293	1.83255	0.00992956	4.17908	0.0585419
	Median	29.25	15.49	0.25	25.65	0.315	9.965	1.455	0.00492	5.175	0.016875
WT-MYXV
Mouse	Flank	CD3+	NKT	Act NKT	NK Cells	Act NK	CD3+/Live	NKT/Live	Act NKT/L	NK/Live	Act NK/Live
1	L	42.8	17.9	1.12	4.08	15.4	41.5	7.41	0.46	2.26	0.35
1	R	30.6	16.7	0	1.34	2.41	29.5	4.94	0	0.89	0.022
2	L	48.1	14.2	0.32	4.84	6.6	45.5	6.46	0.14	2.38	0.16
2	R	57.3	8.86	0.34	15.4	5.38	55.6	4.93	0.19	6.41	0.34
3	L	28.7	12.6	0.02	4.29	1.32	26.8	3.38	0.00537	2.86	0.038
3	R	57.1	12.9	0.11	17.1	8.94	39.8	5.12	0.043	5.1	0.46
	X	44.1	13.86	0.318333	7.84167	6.675	39.7833	5.37333	0.139728	3.31667	0.228333
	SD	12.4927	3.22528	0.41878	6.64667	5.09519	10.584	1.39648	0.174375	2.04157	0.181335
	Median	45.45	13.55	0.215	4.565	5.99	40.65	5.03	0.0915	2.62	0.25
IL-15
Mouse	Flank	CD3+	NKT	Act NKT	NK Cells	Act NK	CD3+/Live	NKT/Live	Act NKT/Live	NK/Live	Act NK/Live
1	R	39.2	26.7	77.5	6.03	36	46.3905	10.5	8.12	3.38	1.22
2	R	54.1	15.7	78.8	21.7	76.3	65.4964	8.5	6.69	9.07	6.92
2	L	41.1	25.3	75	14.8	62.9	52.9639	10.4	7.78	7.64	4.8
3	R	47.6	31.5	85	11	58.7	58.0488	15	12.7	5.32	3.12
3	L	42.8	31.3	84.1	11.3	47.1	48.5261	13.4	11.2	6.05	2.85
4	R	33.3	39.2	79.7	7.49	31.7	39.5487	13.1	10.4	4.41	1.4
4	L	35.1	33	80.3	7.2	25	44.1509	11.6	9.32	4.22	1.05
	Average	41.8857	28.9571	80.0571	11.36	48.2429	50.7322	11.7857	9.45857	5.72714	3.05143
	SD	7.19107	7.38734	3.52744	5.47074	18.6032	8.83737	2.20108	2.11026	2.02563	2.16624
	Median	41.1	31.3	79.7	11	47.1	48.5261	11.6	9.32	5.32	2.85
IL-15Ra
Mouse	Flank	CD3+	NKT	Act NKT	NK Cells	Act NK Cells	CD3+/Live	NKT/Live	Act NKT/Live	NK/Live	Act NK/Live
1	R	39.6	16.3	74	7.82	30	46.8085	6.47	4.79	4.05	1.21
1	L	44.3	27.2	85.1	14.6	58.3	54.4226	12	10.2	6.8	3.96
2	R	46.3	32.6	79.2	11.6	58.3	56.5324	15.1	12	5.28	3.08
2	L	38.5	21.1	79.2	15.6	66.6	52.4523	8.13	6.44	7.82	5.21
3	R	45.6	40.6	79.2	12.1	60.5	56.0886	18.5	14.7	5.71	3.46
4	R	34.8	27.3	86.7	14.3	48.5	41.6766	9.51	8.24	8.56	4.15
	Average	41.5167	27.5167	80.5667	12.67	53.7	51.3302	11.6183	9.395	6.37	3.51167
	SD	4.58668	8.53403	4.62371	2.82698	12.99	5.90192	4.53308	3.65648	1.67867	1.34011
	Median	41.95	27.25	79.2	13.2	58.3	53.4375	10.755	9.22	6.255	3.71
mLIGHT
Mouse	Flank	CD3+	NKT	Act NKT	NK Cells	Act NK Cells	CD3+/L	NKT/Live	Act NKT/Live	NK/Live	Act NK/Live
1	R	47.5	26.1	37	12.6	43.2	32.8	8.55	3.17	3.8	1.64
1	L	52.9	31.4	42.1	9.48	56.1	41.6	13.1	5.5	3.05	1.71
2	R	55.1	45.7	44.6	26.4	48.7	41.1	18.8	8.37	7.06	3.44
2	L	48.9	53.4	41.3	14	57	39.2	21	8.66	5.02	2.86
3	R	52.8	44	46.7	5.68	55.1	42.9	18.9	8.81	1.69	0.93
3	L	52.3	40.7	51.8	7.55	61.2	41.9	17.1	8.84	2.49	1.52
	Average	51.5833	40.2167	43.9167	12.6183	53.55	39.9167	16.2417	7.225	3.85167	2.01667
	SD	2.82731	9.95418	5.06652	7.42322	6.48035	3.694	4.60483	2.3626	1.94065	0.93814
	Median	52.55	42.35	43.35	11.04	55.6	41.35	17.95	8.515	3.425	1.675

## Sheet: DC
Supplementary table 3. DC frequencies from parent population or total live cells. DC: dendritic cell; cDCs: conventional DCs; Dcmig: CD103+ DC; MDSCs: Myeloid derived stem cell
PBS													FOLD CHANGE
Mouse	Flank	CD11b+	cDCs	DCmig	CD11c-	MDSCs	cDCs/L	DCmig/L	CD11b+/L	MDSCs/L				CD11b+	cDCs	DCmig	CD11c-	MDSCs	cDCs/L	DCmig/L	CD11b+/L	MDSCs/L
1	L	34.8	24.8	22.7	51.1	81.2	4.2	0.95	34.8	14.4			IL-15	0.731343	0.731797	2.86512	1.31192	0.0489074	0.927073	2.28767	0.400955	0.0462847
1	R	22.4	36.3	12.2	44.6	46.4	4.46	0.54	22.4	4.64			IL-15Ra	0.868913	1.03629	2.52634	1.0826	0.256589	1.5259	3.81018	0.37745	0.318239
2	L	22.1	33.9	12	65.7	86.9	2.56	0.31	22.1	12.6			mLIGHT	1.76821	1.89798	2.68888	0.804242	0.517544	5.41459	12.937	0.529746	0.632162
2	R	24.4	44.5	8.39	31.3	30.2	7.45	0.62	24.4	2.31			WT-MYXV	1.57075	1.3803	0.0227942	0.732121	0.177193	3.36663	0.0615068	1.41134	0.10683
3	L	44.6	20.2	49.4	11.4	20.1	7.98	3.94	44.6	1.02
3	R	19.2	31.2	27.8	43.4	60.1	3.38	0.94	19.2	5
	X	27.9167	31.8167	22.0817	41.25	54.15	5.005	1.21667	27.9167	6.66167
	SD	9.78088	8.60079	15.2717	18.4429	26.9545	2.20873	1.35648	9.78088	5.52737
	Median	23.4	32.55	17.45	44	53.25	4.33	0.78	23.4	4.82
IL-15
Mouse	Flank	CD11b+	cDC	DCmig	DC-	MDSCs	cDCs/Live	DCmig/Live	DC-/Live	MDSCs/Live
1	R	16	27.4	87.5	45.7	2.68	4.39	3.84	7.33	0.2
2	R	19.8	12.8	87.1	71.5	3.26	2.55	2.22	14.2	0.46
2	L	25.2	10.4	60.9	70.1	3.39	2.63	1.6	17.6	0.6
3	R	20.4	36.6	55.2	38.7	2.3	7.45	4.11	7.89	0.18
3	L	25	26.9	48.7	48	1.78	6.72	3.28	12	0.21
4	L	16.1	25.6	40.2	50.7	2.48	4.1	1.65	8.14	0.2
	X	20.4167	23.2833	63.2667	54.1167	2.64833	4.64	2.78333	11.1933	0.308333
	SD	4.05976	9.88543	19.8505	13.5296	0.604795	2.04865	1.10683	4.14479	0.177586
	Median	20.1	26.25	58.05	49.35	2.58	4.245	2.75	10.07	0.205
IL-15Ra
Mouse	Flank	CD11b+	cDC	DCmig	DC-	MDSCs	cDCs/Live	DCmig/Live	DC-/Live	MDSCs/Live
1	R	12.4	18.6	30.3	51.1	4.15	2.31	0.7	6.32	0.26
1	L	19.9	43.5	61	34.4	7.98	8.67	5.29	6.85	0.55
2	R	22.5	47.7	67.3	31.8	15.4	10.7	7.21	7.13	1.1
2	L	19.8	39.7	65.7	41.1	2.41	7.86	5.16	8.13	0.2
3	R	29.4	43	59	31.4	12.4	12.6	7.45	9.23	1.15
4	R	40	21.5	75.2	67	49.5	6.98	5.25	21.7	10.8
4	L	25.8	16.8	32	55.8	5.42	4.34	1.39	14.4	0.78
	X	24.2571	32.9714	55.7857	44.6571	13.8943	7.63714	4.63571	10.5371	2.12
	SD	8.74831	13.3746	17.6096	13.6857	16.36	3.53103	2.63477	5.62764	3.84556
	Median	22.5	39.7	61	41.1	7.98	7.86	5.25	8.13	0.78
mLIGHT
Mouse	Flank	CD11b+	DC+	DCmig	DC-	MDSCs	DC+/Live	DCmig/Live	DC-/Live	MDSCs/Live
1	R	34.5	51.5	49.1	44.3	47.6	17.8	8.72	15.3	7.27
1	L	47.4	40.8	48	53.3	27.3	19.3	9.3	25.3	6.9
2	R	46.4	68	54	26.8	39.6	31.6	17	12.5	4.94
2	L	51.9	59.9	42.8	33.2	25.8	31.1	13.3	17.3	4.45
3	R	50.3	69.8	50.7	23.8	30.7	35.1	17.8	12	3.67
3	L	53.4	63	44.7	30.1	19.1	33.6	15	16.1	3.07
4	R	55.4	63.3	93.7	28.8	15.6	21.1	19.8	9.61	1.5
4	L	55.6	66.8	92	25.1	18.5	27.2	25	10.2	1.89
	X	49.3625	60.3875	59.375	33.175	28.025	27.1	15.74	14.7888	4.21125
	SD	6.89201	9.75316	20.9482	10.3587	11.0489	6.82265	5.41582	5.06621	2.12159
	Median	51.1	63.15	49.9	29.45	26.55	29.15	16	13.9	4.06
WT-MYXV		CD11b+	cDCs	DCmig	CD11c+	MDSCs	cDCs/Live	DCmig/Live	CD11b+/Live	MDSCs/Live
1	L	67.7	43.8	0	43.5	0.79	26	0	59.2	0.2
1	R	50.6	29.8	0.25	40.4	2.41	13.9	0.035	46.6	0.45
2	L	40	51.7	0.16	26.4	8.37	18.7	0.029	36.2	0.8
2	R	29.6	52.3	0.25	24.4	4.1	14.5	0.036	27.6	0.28
3	L	24.9	46.3	0.94	21.5	34	10.6	0.099	22.8	1.67
3	R	50.3	39.6	1.42	25	7.9	17.4	0.25	44	0.87
	X	43.85	43.9167	0.503333	30.2	9.595	16.85	0.0748333	39.4	0.711667
	SD	15.7033	8.41984	0.553269	9.29236	12.3234	5.30537	0.09172	13.3423	0.541827
	Median	45.15	45.05	0.25	25.7	6	15.95	0.0355	40.1	0.625

## Sheet: Fold Change
Supplementary table 4. Fold change, ratio of cell population over PBS control
FOLD CHANGE
NK
	CD3+	NKT Cells	Act NKT	NK Cells	Act NK	CD3+/Live	NKT/Live	Act NKT/Live	NK/Live	Act NK/Live
IL-15	1.56875	1.71327	265.383	0.499231	84.3898	5.06309	6.05431	1177.42	0.987438	66.158
IL-15Ra	1.55493	1.62804	267.072	0.556801	93.9359	5.12277	5.96832	1169.5	1.09828	76.1364
mLight	1.93196	2.37945	145.58	0.55453	93.6735	3.9837	8.34332	899.378	0.66408	43.7234
WT-MYXV	1.65169	0.820037	1.05525	0.344613	11.6764	3.97039	2.76027	17.3936	0.571839	4.9505
T
	CD4+	CD4+Tem	CD4+Tcm	CD4+Tn	CD4+Teff	CD8+	CD8+Tem	CD8+Tcm	CD8+Tn	CD8+Teff	CD4+/Live	CD4+Tem/Live	CD8+/Live	CD8+Tem/Live
IL-15	6.32515	0.927836	0.0864979	3.02335	22.106	2.38131	0.773258	0.136804	7.72201	15.941	0.445397	0.406967	0.181778	0.14038
IL-15Ra	6.73836	0.859146	0.178797	1.93385	37.1495	2.03801	0.789426	0.152542	3.0888	14.9758	1.00885	0.897763	0.392989	0.361217
mLight	4.94157	0.994983	0.685127	2.31907	3.74565	0.716947	0.801617	0.711864	10.9653	13.6613	6.47221	6.41745	1.11389	0.898555
WT-MYXV	0.653006	1.02804	0	0	0.13905	1.64303	1.01715	0	0	0.0656007	0.882868	0.902483	2.87748	2.9384
DC
	CD11b+	cDCs	DCmig	MDSCs	cDCs/L	DCmig/L	CD11b+/L	MDSCs/L
IL-15	0.731343	0.731797	2.86512	0.0489074	0.927073	2.28767	0.400955	0.0462847
IL-15Ra	0.868913	1.03629	2.52634	0.256589	1.5259	3.81018	0.37745	0.318239
mLIGHT	1.76821	1.89798	2.68888	0.517544	5.41459	12.937	0.529746	0.632162
WT-MYXV	1.57075	1.3803	0.0227942	0.177193	3.36663	0.0615068	1.41134	0.10683
CD4:CD8 Ratio
	Cell number
	CD4+/CD45+	CD8+/CD45+	Ratio
IL-15	632.515	238.131	2.65616
IL-15Ra	673.836	203.801	3.30634
mLIGHT	494.157	71.6947	6.89252
WT-MYXV	65.3006	164.303	0.39744
Summary
NK cell panel
Treatment		CD3+	NKT	Act NKT	NK Cells	Act NK	CD3+/Live	NKT/Live	Act NKT/Live	NK/Live	Act NK/Live
PBS	Average	26.7	16.9017	0.301667	22.755	0.571667	10.02	1.94667	0.00803333	5.8	0.0461233
	SD	5.85696	13.7946	0.23769	11.0295	0.647068	2.86293	1.83255	0.00992956	4.17908	0.0585419
MYXV	X	44.1	13.86	0.318333	7.84167	6.675	39.7833	5.37333	0.139728	3.31667	0.228333
	SD	12.4927	3.22528	0.41878	6.64667	5.09519	10.584	1.39648	0.174375	2.04157	0.181335
IL-15	Average	41.8857	28.9571	80.0571	11.36	48.2429	50.7322	11.7857	9.45857	5.72714	3.05143
	SD	7.19107	7.38734	3.52744	5.47074	18.6032	8.83737	2.20108	2.11026	2.02563	2.16624
IL-15Ra	Average	41.5167	27.5167	80.5667	12.67	53.7	51.3302	11.6183	9.395	6.37	3.51167
	SD	4.58668	8.53403	4.62371	2.82698	12.99	5.90192	4.53308	3.65648	1.67867	1.34011
mLIGHT	Average	51.5833	40.2167	43.9167	12.6183	53.55	39.9167	16.2417	7.225	3.85167	2.01667
	SD	2.82731	9.95418	5.06652	7.42322	6.48035	3.694	4.60483	2.3626	1.94065	0.93814
T cell panel
Treatment		CD4+	CD4+Tem	CD4+Tcm	CD4+Tn	CD4+Teff	CD8+	CD8+Tem	CD8+Tcm	CD8+Tn	CD8+Teff	CD4+/Live	CD4+Tem/Live	CD8+/Live	CD8+Tem/Live
PBS	Average	7.38125	97.175	2.37	0.032125	0.4315	16.64	97.4125	1.0325	0.032375	1.52438	4.52125	4.41375	8.45125	8.21875
	SD	3.5522	1.05796	1.1976	0.0805099	0.513627	8.42205	1.72663	0.880596	0.0473586	1.871	3.37651	3.30532	4.2372	4.07933
MYXV	X	4.82	99.9	0	0	0.06	27.34	99.0833	0	0	0.1	3.99167	3.98333	24.3183	24.15
	SD	2.70645	0.167332	0	0	0.146969	13.6913	1.85625	0	0	0.118152	2.03198	2.01892	13.0529	13.1366
IL-15	Average	46.6875	90.1625	0.205	0.097125	9.53875	39.625	75.325	0.14125	0.25	24.3	2.01375	1.79625	1.53625	1.15375
	SD	13.0565	2.98182	0.464235	0.168584	2.82343	10.4152	5.43658	0.257817	0.19376	5.47462	1.09492	0.947205	0.366759	0.27391
IL-15Ra	Average	49.7375	83.4875	0.42375	0.062125	16.03	33.9125	76.9	0.1575	0.1	22.8287	4.56125	3.9625	3.32125	2.96875
	SD	18.6594	8.66527	0.93825	0.101681	9.1906	11.4667	9.58853	0.244292	0.187236	9.81557	5.79422	5.56824	5.09608	5.23129
mLIGHT	Average	36.475	96.6875	1.62375	0.0745	1.61625	11.93	78.0875	0.735	0.355	20.825	29.2625	28.325	9.41375	7.385
	SD	7.41037	2.91471	1.67041	0.113377	1.24343	5.94014	15.882	0.877252	0.590786	16.1174	5.60967	5.71608	3.28738	3.4371
DC panel
Treatment		CD11b+	cDCs	DCmig	MDSCs	cDCs/L	DCmig/L	CD11b+/L	MDSCs/L
PBS	X	27.9167	31.8167	22.0817	54.15	5.005	1.21667	27.9167	6.66167
	SD	9.78088	8.60079	15.2717	26.9545	2.20873	1.35648	9.78088	5.52737
MYXV	X	43.85	43.9167	0.503333	9.595	16.85	0.0748333	39.4	0.711667
	SD	15.7033	8.41984	0.553269	12.3234	5.30537	0.09172	13.3423	0.541827
IL-15	X	20.4167	23.2833	63.2667	2.64833	4.64	2.78333	11.1933	0.308333
	SD	4.05976	9.88543	19.8505	0.604795	2.04865	1.10683	4.14479	0.177586
IL-15Ra	X	24.2571	32.9714	55.7857	13.8943	7.63714	4.63571	10.5371	2.12
	SD	8.74831	13.3746	17.6096	16.36	3.53103	2.63477	5.62764	3.84556
mLIGHT	X	49.3625	60.3875	59.375	28.025	27.1	15.74	14.7888	4.21125
	SD	6.89201	9.75316	20.9482	11.0489	6.82265	5.41582	5.06621	2.12159

## Sheet: Cytokine Panel 
Supplementary table 5a. Raw data, Mouse Cytokine 44-Plex assay.
Raw data
Units: pg/mL
		Eotaxin	G-CSF	GM-CSF	IFNγ	IL-1α	IL-1β	IL-2	IL-3	IL-4	IL-5	IL-6	IL-7	IL-9	IL-10	IL-12p40	IL-12p70	IL-13	IL-15	IL-17	IP-10	KC	LIF	LIX	M-CSF	MCP-1	MIG	MIP-1α	MIP-1β	MIP-2	RANTES	TNFα	VEGF	6Ckine/Exodus 2	EPO	Fractalkine	IFNβ-1	IL-11	IL-16	IL-20	MCP-5	MDC	MIP-3α	MIP-3β	TARC
Serum Matrix	Treatment	Exp Conc.	Exp Conc.	Exp Conc.	Exp Conc.	Exp Conc.	Exp Conc.	Exp Conc.	Exp Conc.	Exp Conc.	Exp Conc.	Exp Conc.	Exp Conc.	Exp Conc.	Exp Conc.	Exp Conc.	Exp Conc.	Exp Conc.	Exp Conc.	Exp Conc.	Exp Conc.	Exp Conc.	Exp Conc.	Exp Conc.	Exp Conc.	Exp Conc.	Exp Conc.	Exp Conc.	Exp Conc.	Exp Conc.	Exp Conc.	Exp Conc.	Exp Conc.	Exp Conc.	Exp Conc.	Exp Conc.	Exp Conc.	Exp Conc.	Exp Conc.	Exp Conc.	Exp Conc.	Exp Conc.	Exp Conc.	Exp Conc.	Exp Conc.
M1	PBS	1060.22	655.3	0	2.92	36.86	26.24	1.84	0	0.22	8.38	40.7	16.02	47.16	5.44	0	0	42.16	338.56	0	420.34	82.66	0	3809.3	0.34	153.8	17636.7	0	174.32	0	52.72	21.6	1.24	0	511.58	2440.64	3011.32	161.3	8737.76	419.2	2436.7	641.28	319.28	339.94	736.28
M2	PBS	2096.32	851.8	0	8.18	128.06	12.38	0.92	6.58	1.32	90.46	19.52	7.14	142.64	4.84	36.3	22.1	50.24	116.72	4.64	359.7	97.48	1.22	6105.98	14.04	145.04	7132.44	42.64	280.58	162.6	20.76	19.92	2.34	0	949.24	3573.12	3314.86	123.4	6509.8	492.64	2964.88	998.14	394.2	448.28	1563.26
M3	IL-15	2105.62	2332.9	30.74	41.54	87.8	9.86	16.66	3.66	0.84	37.64	72.06	7.68	227.34	10.36	5.14	33.4	72.9	277.4	0.68	584.74	394.84	4.96	4957.66	2.84	444.76	18064.3	0	290.32	118.58	49.3	31.24	2.3	0	1238.44	2943.36	3116.6	206.6	7236.96	193.62	4209.36	1302.04	129.82	587.84	980.02
M4	IL-15	1826.82	1148.56	8.52	14.68	181.34	12.8	0	8.6	1.88	93.28	45.4	137.2	170.58	12.8	74.52	67.48	69.26	3279.46	1.04	460.9	154.54	5.3	7220.72	12.8	156.72	6648.78	85.92	352.22	45.7	23.86	22.26	2.02	0	1372.56	3517.02	2574.88	277.36	3990.46	246.64	5595.5	1445.78	194.26	595.96	1452.8
M5	IL-15	1391.38	2275.16	15.48	13.36	50.76	7.34	1.84	2.56	1.38	104.06	85.56	9.88	192.46	9.74	56.42	77.08	83.9	38.08	3.76	488.5	288.4	2.66	4366.08	14.66	696.54	9128.72	28.1	363.06	136.42	35.48	26.62	2.66	0	674.98	2494.64	5189.52	216.42	5095.7	282.86	9684.78	968.18	194.26	748.08	786.48
M6	IL-15	1554.48	1258.46	0	12.06	174.92	11.12	14.72	1.36	1.12	65.66	56.32	9.88	163.12	12.8	24.94	54.32	66.52	184.7	1.6	318.88	115.94	3.76	5744.22	7.2	327.28	19443.4	42.64	239.26	27.48	87.22	30.96	2.6	0	634.7	3159.96	2199.34	164.98	4190	193.62	2052.8	1373.92	126.16	421.42	1194.66
M7	IL-15Ra	1644.02	986.66	0	25.9	91.62	13.22	14.72	13.64	3.68	43.94	61.58	31.34	213.6	73.2	46.28	306.82	72.9	774.8	2.96	562.96	809.08	3.08	5310.94	2.84	402.9	17970.7	63.14	301.18	54.84	169.62	27.52	2.46	0	806.58	3326.68	3057.62	333.2	14539.1	288.66	5960.98	1120.58	110.86	563	951.34
M8	IL-15Ra	1630.78	1562.54	15.48	59.98	161.9	12.8	0	5.98	0.68	81.24	41.3	6.34	147.84	26.9	13.98	44.06	65.62	161.86	0	563.94	317.94	3.6	3374.2	6.58	312.6	18971.4	36.02	331.14	0	84.1	24.48	0.94	0	970.98	2997.64	4333.62	91.88	6457.36	294.42	4243.8	926.38	122.44	424.84	974.92
M9	IL-15Ra	1622.94	1668.86	8.52	22.08	102.9	11.96	0	8.1	1.58	105.76	54.64	9.6	145.24	12.8	35.48	54.32	48.44	55.14	0.3	596.74	187.78	2.32	3682.04	15.3	684	13291.8	0	210.12	9.42	44.22	16.72	2.52	0	541.96	2501.18	4235.58	211.82	5107.46	259	14806	1106.66	163.82	846.6	1295.22
M10	IL-15Ra	1532.38	2490.4	12.36	73.78	87.8	17.84	11.42	9.1	2.94	120.18	64.42	11.3	142.64	11.58	47.96	0	96.82	376.52	1.28	544.66	83.98	4.96	3431.46	0.98	614.04	24614.5	71.44	343.64	64	62.52	27.52	2.46	0	519.26	2884.88	2646.04	171.08	6756.5	220.94	8008.88	748.1	89.9	688.38	532.02
M11	mLIGHT	1807.56	853.1	18.2	8.36	145.24	17	0	0	0.86	51.06	31.5	8.22	142.64	0	49.64	67.48	48.44	98.9	0	343.74	58.56	175.12	8651.28	6.58	212.22	6628.6	48.48	181.82	0	15.74	12.8	2.5	0	1070.88	2206.52	2199.34	138.6	5794.7	379.96	3069	769.48	106.86	513.9	879.42
M12	mLIGHT	2420.44	1731.66	0	6.36	102.9	15.74	12.08	7.28	1.3	182.54	52.32	29.02	147.84	13.42	8.74	73.9	47.54	125.68	1.38	480.04	462.9	3.76	4724.68	7.82	415.18	2567.5	82.52	170.48	0	44.62	17.46	2.26	16409.5	287.86	2751.24	3011.32	187.86	4088.34	438.14	6020.74	505.3	163.82	619.92	551.96
M13	mLIGHT	1014.32	2047.62	0	9.64	0	9.86	7.96	3.86	0.52	28.44	51.48	10.46	134.74	10.36	73.66	44.06	56.54	38.08	3.86	400.58	462.14	4.2	4950.24	8.44	478.44	2917.56	53.76	260.46	136.42	57.16	14.42	3.28	0	921.68	2357.78	2520.5	165.6	4429.98	179.2	6171.68	884.38	150.74	554.54	484.32
M14	mLIGHT	648.72	307.9	19.46	9.84	0	11.96	0	1.36	0.28	6.4	7.12	516.98	123.96	0	102.78	83.36	43.06	13033.4	1.82	131.04	28.62	77.62	1307.8	0	96.54	4021.58	42.64	190.96	0	34.6	3.56	1.08	4410.9	265.7	317.04	231.62	409.2	2339.02	10.2	276.7	92.92	17.16	193.5	121.86
M15	IL-15Ra PRE	713.3	742.68	15.48	4.72	0	13.22	0	0.66	0	17.02	19.44	12.76	50.76	8.52	13.22	0	52.04	637.2	0	235.36	39.62	4.8	2056.64	7.82	64	14136.6	58.6	229.82	228.2	2.42	5.52	1	0	386.48	1847.12	6916.44	208.34	6582.04	379.96	1247.5	436.76	179.4	293.1	415.96
M14 was not considered for analysis, the company advised to leave out due to high standard deviation and weak signal from replicates.
IL-15Ra PRE: Sample taken before the start of treatment, used as PBS control
Supplementary table 5b. Mouse Cytokine 44-Plex assay data analysis.
Units: pg/mL																								Organized by high to low expression for heat map
	PBS			IL-15			IL-15Ra		17	mLIGHT				Fold change					Log2 of Fold Change					Log2 of Fold Change
	Average	SD		Average	SD		Average	SD		Average	SD			Cytokine	IL-15	IL-15Ra	mLIGHT		Cytokine	IL-15	IL-15Ra	mLIGHT		Cytokine	IL-15	IL-15Ra	mLIGHT
Eotaxin	1289.95	719.56		1719.57	313.847		1607.53	50.8497		1747.44	704.985			Eotaxin	1.33306	1.2462	1.35466		Eotaxin	0.414741	0.317534	0.437932		IL-12p70	2.97871	3.78148	3.06883
G-CSF	749.927	98.4502		1753.77	637.404		1677.11	619.504		1544.13	618.948			G-CSF	2.33859	2.23637	2.05904		G-CSF	1.22564	1.16116	1.04197		IFNγ	1.95249	3.10702	0.622765
GM-CSF	5.16	8.93738		13.685	13.0135		9.09	6.69522		6.06667	10.5078			GM-CSF	2.65213	1.76163	1.17571		GM-CSF	1.40715	0.816909	0.233533		IL-2	3.17427	2.82848	2.86014
IFNγ	5.27333	2.6733		20.41	14.1272		45.435	25.4432		8.12	1.65312			IFNγ	3.87042	8.61599	1.53982		IFNγ	1.95249	3.10702	0.622765		IL-10	0.866424	2.31207	0.339016
IL-1α	54.9733	65.9235		123.705	64.6913		111.055	34.4975		82.7133	74.6946			IL-1α	2.25027	2.02016	1.50461		IL-1α	1.1701	1.01447	0.589388		KC	1.7026	2.25513	2.16214
IL-1β	17.28	7.77095		10.28	2.30043		13.955	2.64244		14.2	3.81098			IL-1β	0.594907	0.807581	0.821759		IL-1β	-0.749263	-0.308321	-0.283212		IL-4	1.34608	2.11259	0.799303
IL-2	0.92	0.92		8.305	8.59704		6.535	7.66529		6.68	6.14088			IL-2	9.02717	7.10326	7.26087		IL-2	3.17427	2.82848	2.86014		MCP-1	1.74826	2.05729	1.60774
IL-3	2.41333	3.6235		4.045	3.17861		9.205	3.23017		3.71333	3.64222			IL-3	1.6761	3.81423	1.53867		IL-3	0.745113	1.93139	0.621688		IL-3	0.745113	1.93139	0.621688
IL-4	0.513333	0.707201		1.305	0.442229		2.22	1.34551		0.893333	0.391067			IL-4	2.54221	4.32468	1.74026		IL-4	1.34608	2.11259	0.799303		MCP-5	1.28092	1.89706	1.19866
IL-5	38.62	45.1021		75.16	29.7856		87.78	33.3554		87.3467	83.212			IL-5	1.94614	2.27292	2.2617		IL-5	0.960617	1.18454	1.1774		RANTES	0.952613	1.83263	0.630735
IL-6	26.5533	12.2514		64.835	17.6253		55.485	10.3104		45.1	11.7854			IL-6	2.44169	2.08957	1.69847		IL-6	1.28788	1.0632	0.764234		IL-5	0.960617	1.18454	1.1774
IL-7	11.9733	4.49196		41.16	64.0351		14.645	11.3187		15.9	11.4173			IL-7	3.43764	1.22313	1.32795		IL-7	1.78142	0.290583	0.409202		G-CSF	1.22564	1.16116	1.04197
IL-9	80.1867	54.1161		188.375	28.8065		162.33	34.2459		141.74	6.59621			IL-9	2.34921	2.0244	1.76763		IL-9	1.23217	1.0175	0.821813		IL-12p40	1.28612	1.12194	1.41489
IL-10	6.26667	1.97437		11.425	1.60776		31.12	28.902		7.92667	7.03313			IL-10	1.82314	4.96596	1.26489		IL-10	0.866424	2.31207	0.339016		IL-6	1.28788	1.0632	0.764234
IL-12p40	16.5067	18.3718		40.255	31.1074		35.925	15.6402		44.0133	32.8237			IL-12p40	2.43871	2.17639	2.6664		IL-12p40	1.28612	1.12194	1.41489		IL-9	1.23217	1.0175	0.821813
IL-12p70	7.36667	12.7594		58.07	18.9085		101.3	139.025		61.8133	15.7064			IL-12p70	7.88281	13.7511	8.39095		IL-12p70	2.97871	3.78148	3.06883		IL-1α	1.1701	1.01447	0.589388
IL-13	48.1467	5.26214		73.145	7.63138		70.945	20.068		50.84	4.95681			IL-13	1.51921	1.47352	1.05594		IL-13	0.603323	0.559265	0.0785281		GM-CSF	1.40715	0.816909	0.233533
IL-15	364.16	261.183		944.91	1559.48		342.08	317.934		87.5533	44.8888			IL-15	2.59477	0.939367	0.240425		IL-15	1.3756	-0.0902387	-2.05634		MIP-3β	0.706854	0.807206	0.642829
IL-17	1.54667	2.67891		1.77	1.37961		1.135	1.3338		1.74667	1.95595			IL-17	1.1444	0.733836	1.12931		IL-17	0.194587	-0.44647	0.175442		LIF	1.05525	0.798426	4.92657
IP-10	338.467	94.3003		463.255	109.918		567.075	21.6734		408.12	68.4621			IP-10	1.36869	1.67542	1.20579		IP-10	0.452793	0.744526	0.26998		IP-10	0.452793	0.744526	0.26998
KC	73.2533	30.0551		238.43	127.805		349.695	320.865		327.867	233.227			KC	3.25487	4.77378	4.47579		KC	1.7026	2.25513	2.16214		TNFα	0.824602	0.617711	-0.0742589
LIF	2.00667	2.49482		4.17	1.20405		3.49	1.11206		61.0267	98.808			LIF	2.07807	1.7392	30.412		LIF	1.05525	0.798426	4.92657		IL-13	0.603323	0.559265	0.0785281
LIX	3990.64	2030.75		5572.17	1235.53		3949.66	917.313		6108.73	2204.8			LIX	1.39631	0.989731	1.53077		LIX	0.481619	-0.0148917	0.614253		MIG	0.0387154	0.528949	-1.68335
M-CSF	7.4	6.85965		9.375	5.38822		6.425	6.35846		7.61333	0.947066			M-CSF	1.26689	0.868243	1.02883		M-CSF	0.341293	-0.203829	0.041003		MDC	0.878674	0.495141	0.0565386
MCP-1	120.947	49.5114		406.325	226.754		503.385	174.511		368.613	139.085			MCP-1	3.35954	4.16204	3.04773		MCP-1	1.74826	2.05729	1.60774		VEGF	0.649641	0.456565	0.811848
MIG	12968.6	5348.65		13321.3	6379.05		18712.1	4648.83		4037.89	2250.44			MIG	1.0272	1.44288	0.311359		MIG	0.0387154	0.528949	-1.68335		MIP-1β	0.44736	0.377578	-0.160192
MIP-1α	33.7467	30.2954		39.165	35.8443		42.65	32.206		61.5867	18.32			MIP-1α	1.16056	1.26383	1.82497		MIP-1α	0.21482	0.337801	0.867873		MIP-1α	0.21482	0.337801	0.867873
MIP-1β	228.24	53.1476		311.215	57.6872		296.52	60.2924		204.253	49.0055			MIP-1β	1.36354	1.29916	0.894906		MIP-1β	0.44736	0.377578	-0.160192		Eotaxin	0.414741	0.317534	0.437932
MIP-2	130.267	117.486		82.045	53.5093		32.065	32.0391		45.4733	78.7621			MIP-2	0.629823	0.246149	0.349079		MIP-2	-0.666981	-2.0224	-1.51838		IL-11	0.396558	0.297577	-0.00287045
RANTES	25.3	25.4555		48.965	27.5419		90.115	55.4529		39.1733	21.2404			RANTES	1.93538	3.56186	1.54835		RANTES	0.952613	1.83263	0.630735		IL-7	1.78142	0.290583	0.409202
TNFα	15.68	8.83882		27.77	4.23869		24.06	5.09886		14.8933	2.36578			TNFα	1.77105	1.53444	0.94983		TNFα	0.824602	0.617711	-0.0742589		EPO	0.670648	0.204815	0.303881
VEGF	1.52667	0.714516		2.395	0.295466		2.095	0.770519		2.68	0.533292			VEGF	1.56878	1.37227	1.75546		VEGF	0.649641	0.456565	0.811848		IL-16	-0.504776	0.175026	-0.608958
6Ckine/Exodus 2	0	0		0	0		0	0		5469.85	9474.05			CCL21	0	0	5469.85		CCL21	0	0	12.4173		Fractalkine	0.208992	0.159988	-0.103726
EPO	615.767	295.493		980.17	379.984		709.695	217.606		760.14	415.754			EPO	1.59179	1.15254	1.23446		EPO	0.670648	0.204815	0.303881		TARC	0.285818	0.0519811	-0.503346
Fractalkine	2620.29	876.912		3028.74	427.469		2927.6	340.504		2438.51	281.191			Fractalkine	1.15588	1.11728	0.930626		Fractalkine	0.208992	0.159988	-0.103726		6Ckine/Exodus 2	0	0	12.4173
IFNβ-1	4414.21	2172.31		3270.09	1333.87		3568.22	845.051		2577.05	408.933			IFNβ-1	0.740809	0.808348	0.583809		IFNβ-1	-0.432826	-0.306952	-0.776432		LIX	0.481619	-0.0148917	0.614253
IL-11	164.347	42.5519		216.34	46.3902		201.995	100.652		164.02	24.668			IL-11	1.31636	1.22908	0.998012		IL-11	0.396558	0.297577	-0.00287045		IL-15	1.3756	-0.0902387	-2.05634
IL-16	7276.53	1265.97		5128.28	1485.78		8215.09	4276.57		4771.01	902.851			IL-16	0.70477	1.12898	0.65567		IL-16	-0.504776	0.175026	-0.608958		M-CSF	0.341293	-0.203829	0.041003
IL-20	430.6	57.1985		229.185	43.6479		265.755	33.6667		332.433	135.855			IL-20	0.532246	0.617174	0.772024		IL-20	-0.909836	-0.696251	-0.373283		IFNβ-1	-0.432826	-0.306952	-0.776432
MCP-5	2216.36	879.637		5385.61	3215.49		8254.91	4630.64		5087.14	1749.39			MCP-5	2.42993	3.72454	2.29527		MCP-5	1.28092	1.89706	1.19866		IL-1β	-0.749263	-0.308321	-0.283212
MDC	692.06	284.114		1272.48	211.183		975.43	175.475		719.72	194.377			MDC	1.83868	1.40946	1.03997		MDC	0.878674	0.495141	0.0565386		IL-17	0.194587	-0.44647	0.175442
MIP-3α	297.627	109.025		161.125	38.2902		121.755	31.1094		140.473	29.8356			MIP-3α	0.541366	0.409086	0.471978		MIP-3α	-0.885323	-1.28952	-1.08321		IL-20	-0.909836	-0.696251	-0.373283
MIP-3β	360.44	79.5952		588.325	133.463		630.705	179.723		562.787	53.4889			MIP-3β	1.63224	1.74982	1.56139		MIP-3β	0.706854	0.807206	0.642829		MIP-3α	-0.885323	-1.28952	-1.08321
TARC	905.167	592.002		1103.49	286.397		938.375	313.032		638.567	211.309			TARC	1.2191	1.03669	0.705469		TARC	0.285818	0.0519811	-0.503346		MIP-2	-0.666981	-2.0224	-1.51838
